# Supplementary material for: miR-21 improves the neurological outcome after traumatic brain injury in rats
Source: PubMed Central journal article supplement (PMC4208064; doi:10.1038/srep06718), 2014-10-24
Supplement: srep06718-s1.pdf [file srep06718-s1.pdf]

## **miR-21 improves the neurological outcome after traumatic brain injury in rats**

Xin-Tong Ge<sup>1, 2, 3</sup>, Ping Lei<sup>2, 3, 4</sup>, Hai-Chen Wang<sup>5</sup>, An-Ling Zhang<sup>2, 3, 6</sup>, Zhao-Li Han<sup>1, 2, 4</sup>,  
Xin Chen<sup>1, 2, 3</sup>, Sheng-Hui Li<sup>1, 2, 3</sup>, Rong-Cai Jiang<sup>1, 2, 3</sup>, Chun-Sheng Kang<sup>2, 3, 6</sup>, Jian-Ning  
Zhang<sup>1, 2, 3, \*</sup>

<sup>1</sup> Laboratory of Neuro-Trauma, Tianjin Neurological Institute, Tianjin, China

<sup>2</sup> Key Laboratory of Post-trauma Neuro-repair and Regeneration in Central Nervous System, Ministry of Education, Tianjin, China; Tianjin Key Laboratory of Injuries, Variations and Regeneration of Nervous System, Tianjin, Tianjin, China

<sup>3</sup> Department of Neurosurgery, Tianjin Medical University General Hospital, Tianjin, China

<sup>4</sup> Department of Geriatrics, Tianjin Medical University General Hospital, Tianjin, China; Laboratory of Neuro-Trauma and Neurodegenerative Disorders, Tianjin Geriatrics Institute, Tianjin, China

<sup>5</sup> Department of Neurology, Duke University School of Medicine, Durham, North Carolina, U.S.A

<sup>6</sup> Laboratory of Neuro-Oncology, Tianjin Neurological Institute, Tianjin, China

Corresponding Author

Jian-Ning Zhang, Department of Neurosurgery, Tianjin Medical University General Hospital, Tianjin, 300052, China. Tel./Fax: +86-022-60817448; E-mail: [jianningzhang@hotmail.com](mailto:jianningzhang@hotmail.com)

**Supplementary Figure 1. Altered miR-21 level in the contralateral cerebral cortex after TBI and miR-21 oligomers intervention.**

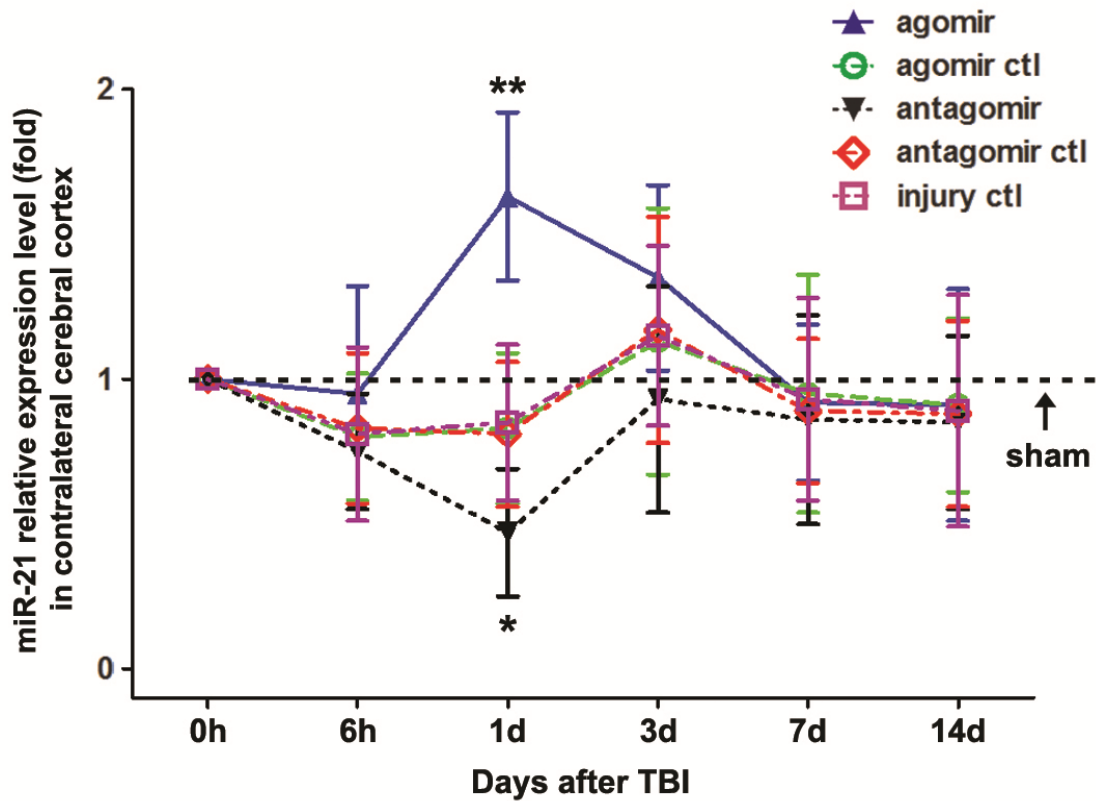

The temporal profile (from 0 h to 14 d post-injury) of miR-21 level in the contralateral cerebral cortex determined by qRT-PCR. The quantitative data were analyzed using the  $2^{-\Delta\Delta Ct}$  method, in which the miR-21 levels of the *sham* group (presented as the dotted line) were used as controls. Note that the miR-21 level in the contralateral cerebral cortex were not altered after TBI (*injury ctrl* group). The miR-21 level at 1 d post-injury can be upregulated (or downregulated) after infusing miR-21 agomir (or antagomir), but its variation extent is much smaller (less than 2-fold alteration) than that in the traumatic foci (more than 7-fold alteration). No difference was observed at other time-points between the *agomir* (or *antagomir*) group and *injury ctrl* group. The data are expressed as mean  $\pm$  SD. (n = 6) (\*P < 0.05, \*\*P < 0.01 versus the *injury ctrl* group)

**Supplementary Figure 2. Representative images of the in-situ immunostained miR-21 in neurons, astrocytes and microglias in different areas of injured brain at 72 h post-injury compared to that of sham group.**

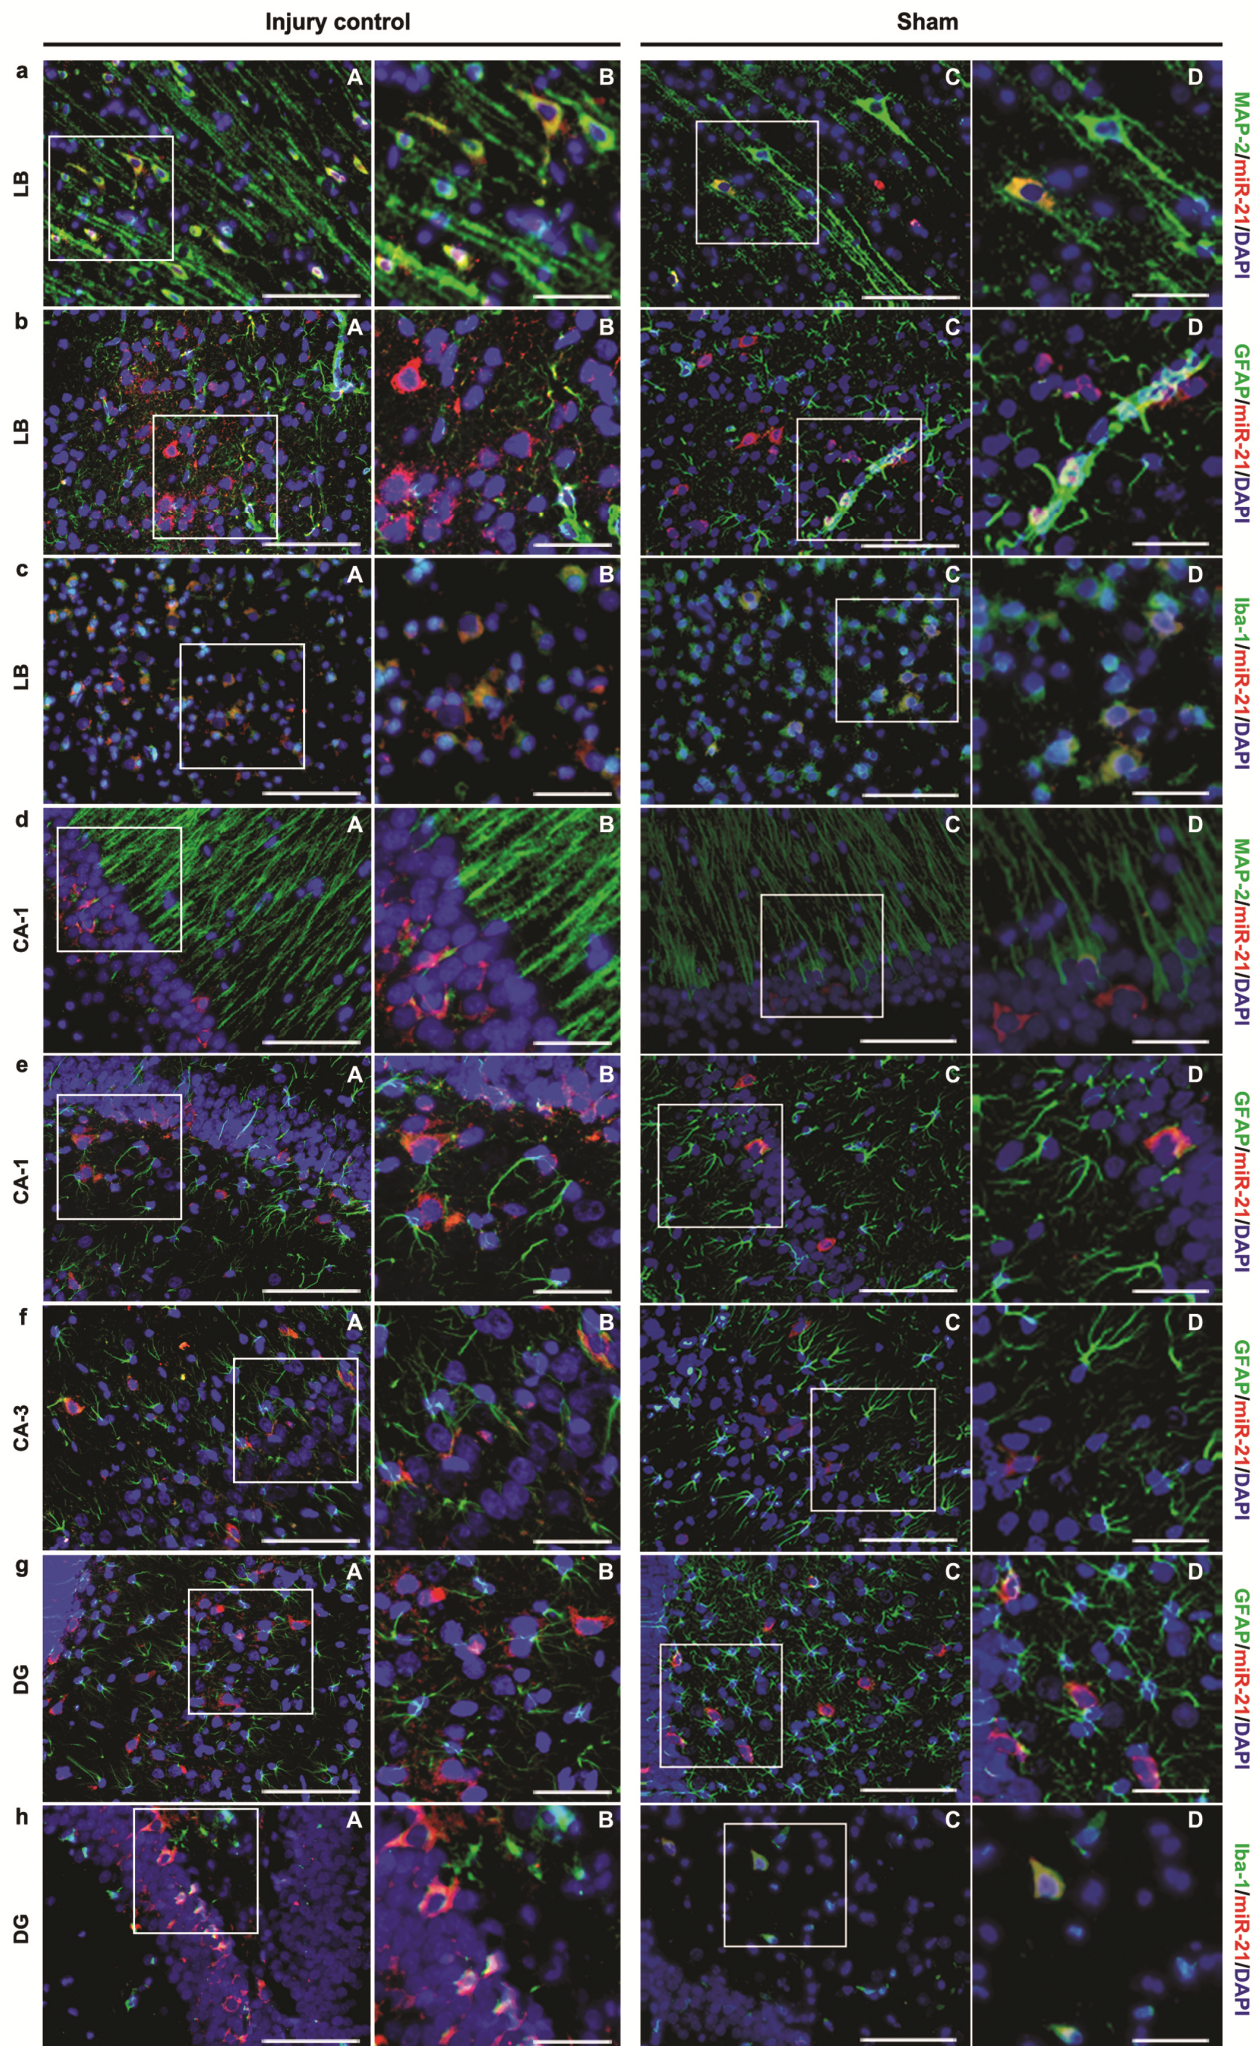

The combined staining of miR-21/MAP-2 (a), miR-21/GFAP (b), miR-21/Iba-1 (c) in the lesioned boundary of cerebral cortex (LB, scope see Figure 3e). The combined staining of miR-21/MAP-2 (d) and miR-21/GFAP (e) in the CA1 (a subdivision of Ammon's horn). The combined staining of miR-21/GFAP (f) in the CA3 (a subdivision of Ammon's horn). The combined staining of miR-21/GFAP (g) and miR-21/Iba-1 (h) in the dentate gyrus (DG). In each set of the figures, Figure A and B were captured from the *injury ctrl* group, and Figure C and D were captured from the *sham* group. The immunostained areas in the white box were magnified from Figure A to B and from Figure C to D. Note that the expression of miR-21 in neurons, astrocytes and microglia were increased at 72 h post-injury. Scale bars: A, C 50 $\mu$ m; B, D 20 $\mu$ m. (n = 6)

**Supplementary Figure 3. The in-situ staining of control probe in neurons, astrocytes and microglias in brain.**

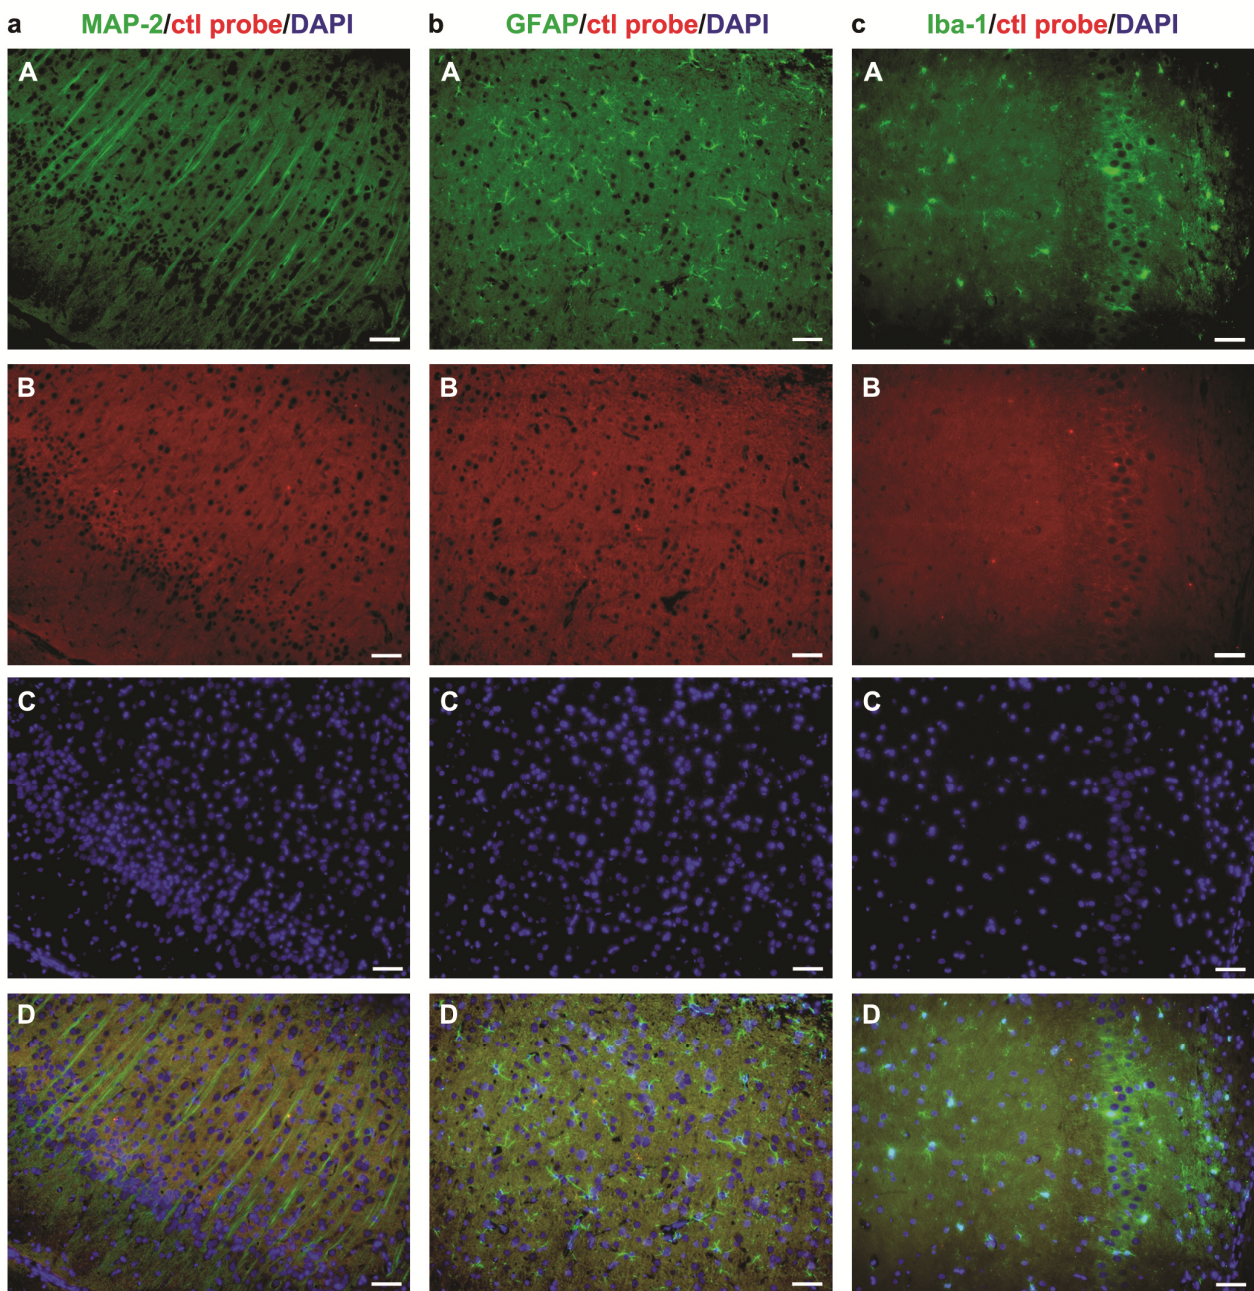

The combined staining of control probe with MAP-2 (a), GFAP (b), and Iba-1 (c) in brain. No co-labeling were observed in the sections. All figures were captured from the sham group. Scale bars: 50 $\mu$ m. (n = 6)

**Supplementary Figure 4. Swim speeds of each group in the Morris Water Mass test.**

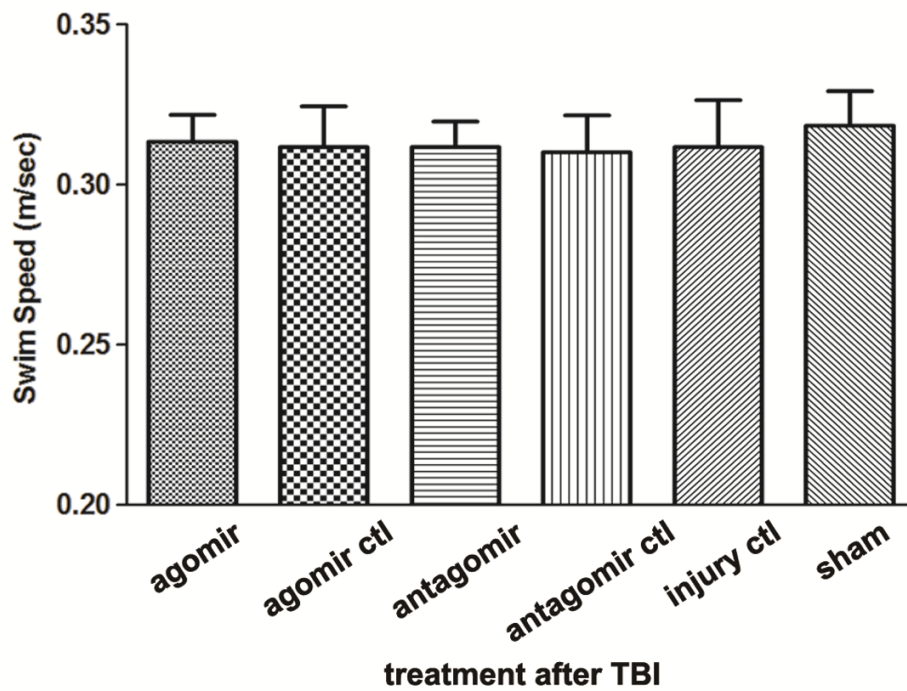

In the Morris Water Mass test, no difference was observed in swim speed among the groups (one-way ANOVA,  $F(5, 30) = 0.070$ ,  $P = 0.996$ ). The data are expressed as mean  $\pm$  SD. ( $n = 6$ )

**Supplementary Figure 5. The impact of miR-21 on cellular apoptosis in contralateral brain after TBI.**

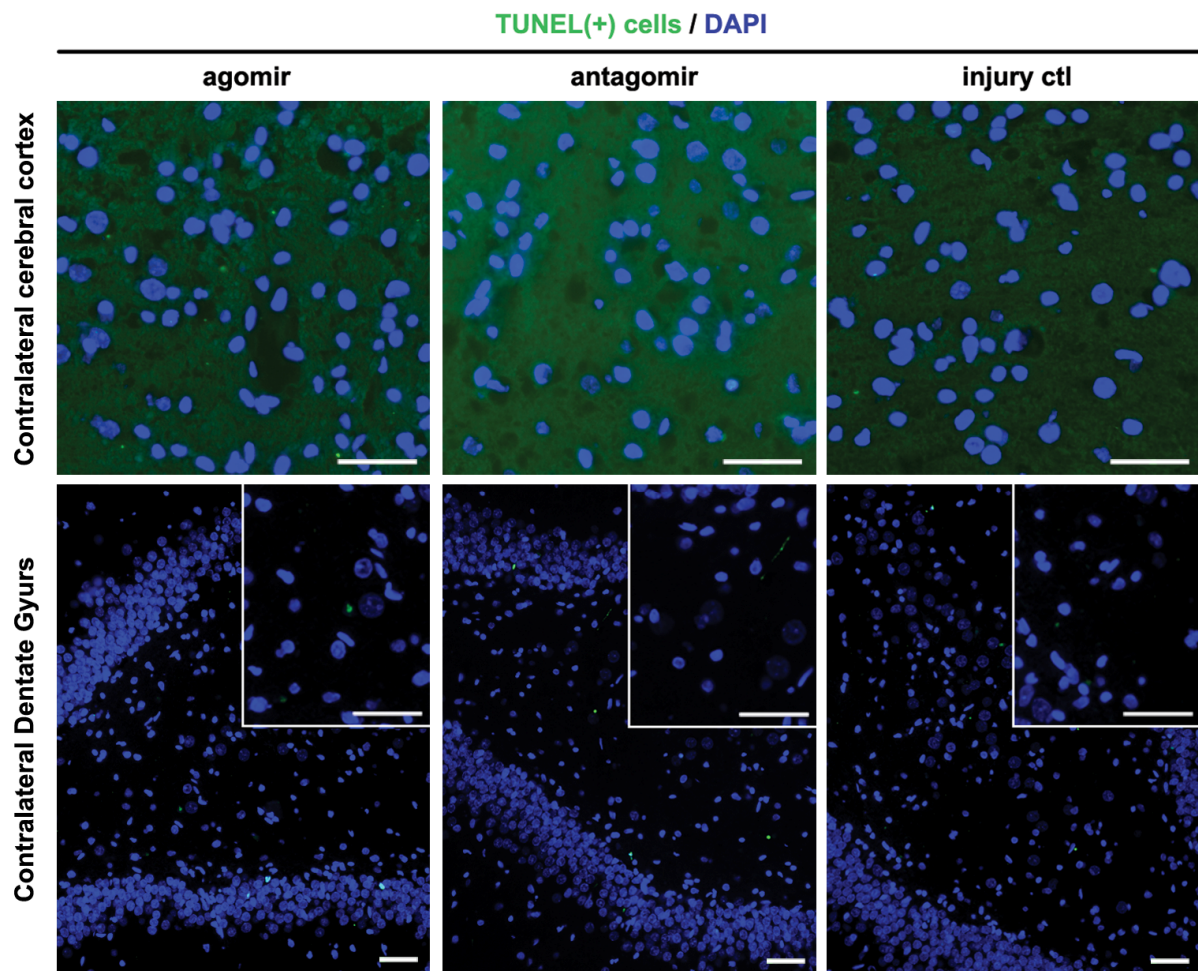

The immunostaining of apoptotic cells in the cerebral cortex and the dentate gyrus of contralateral brain at 72 h post-injury. No difference was observed in apoptosis among the groups, suggesting that the impact of miR-21 on cellular apoptosis in brain after TBI is specific to the injury area. (n = 6)

**Supplementary Table 1. Information about the primary antibodies used in the study.**

| Antibody          | Manufacturer | Catalogue   | Cellular Localization  | Application                   |
|-------------------|--------------|-------------|------------------------|-------------------------------|
| CD31              | Santa Cruz   | sc-53526    | Membrane               | MVD                           |
| MAP-2             | Abcam        | ab32454     | Cytoplasm              | combined FISH and IF staining |
| GFAP              | ZSJB-BIO     | ZA-0117     | Cytoplasm              | combined FISH and IF staining |
| Iba-1             | Abcam        | ab5076      | Cytoplasm              | combined FISH and IF staining |
| PTEN              | CST          | 9559        | Cytoplasm              | WB                            |
| p-AKT(Ser473)     | CST          | 9271        | Cytoplasm              | WB                            |
| AKT               | CST          | 9272        | Cytoplasm              | WB                            |
| Bcl-2             | CST          | 2876        | Mitochondrion membrane | WB                            |
| Bax               | Abcam        | ab7977      | Mitochondrion membrane | WB                            |
| Caspase-3         | CST          | 9665        | Cytoplasm              | WB                            |
| VEGF              | Abcam        | ab68334     | Secreted               | IF & WB                       |
| Ang-1             | Abcam        | ab133425    | Secreted               | IF & WB                       |
| Tie-2             | Millipore    | Ab33 05-584 | Membrane               | IF & WB                       |
| GAPDH             | ZSJB-BIO     | TA-08       | Cytoplasm              | WB                            |
| $\alpha$ -tubulin | Boster       | BM1452      | Cytoplasm              | WB                            |

**Supplementary Table 2. The sequences of miRNA oligomers.**

| miRNA oligomers            | Sequences                    |
|----------------------------|------------------------------|
| miR-21 agomir              | 5'-UAGCUUAUCAGACUGAUGUUGA-3' |
| agomir negative control    | 5'-UUCUCCGAACGUGUCACGUTT-3'  |
| miR-21 antagomir           | 5'-UCAACAUCAGUCUGAUAAGCUA-3' |
| antagomir negative control | 5'-CAGUACUUUUGUGUAGUACAA-3'  |
